# Supplementary material
Source: PubMed Central journal article supplement (PMC4135415)
Supplement: ejhg2013304x2.pdf [file ejhg2013304x2.pdf]

### European

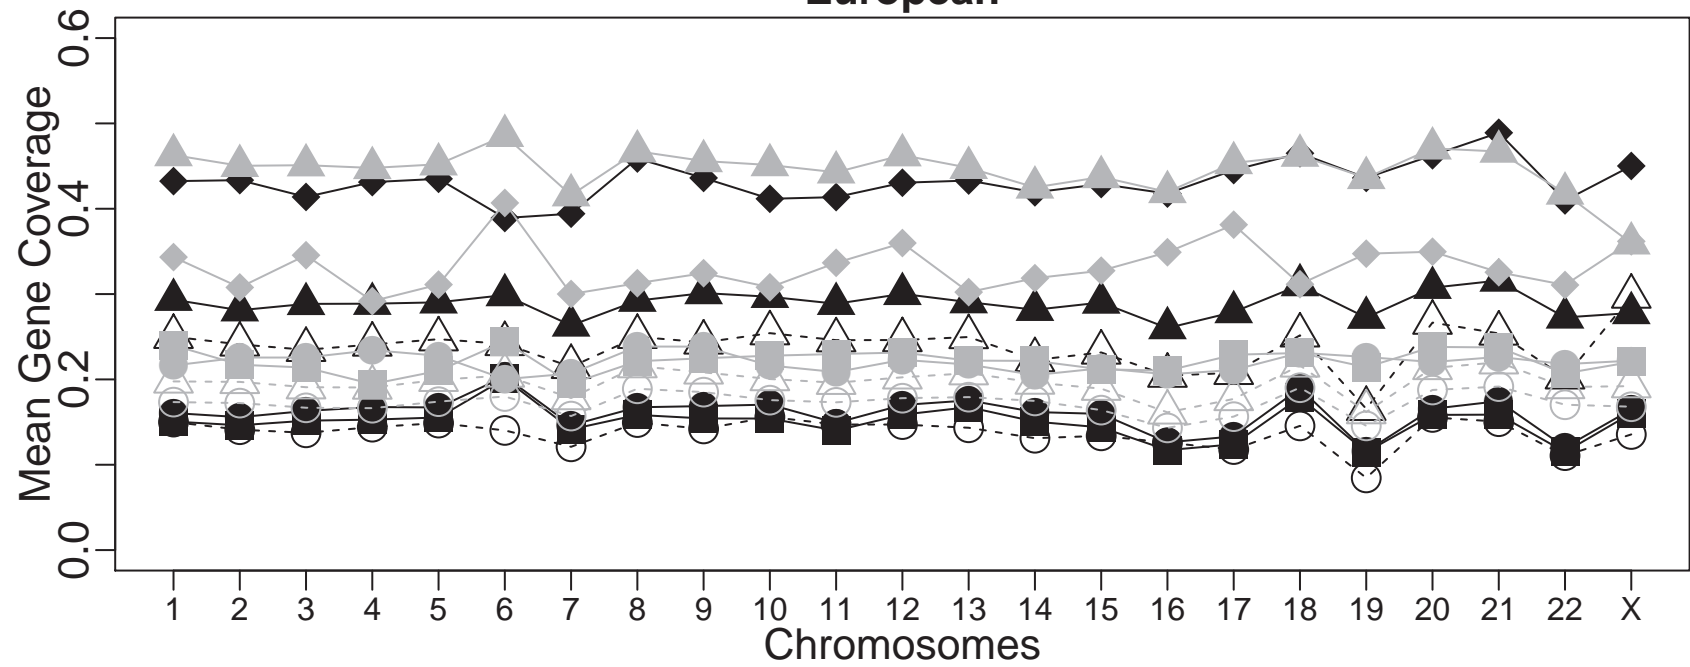

### Asian

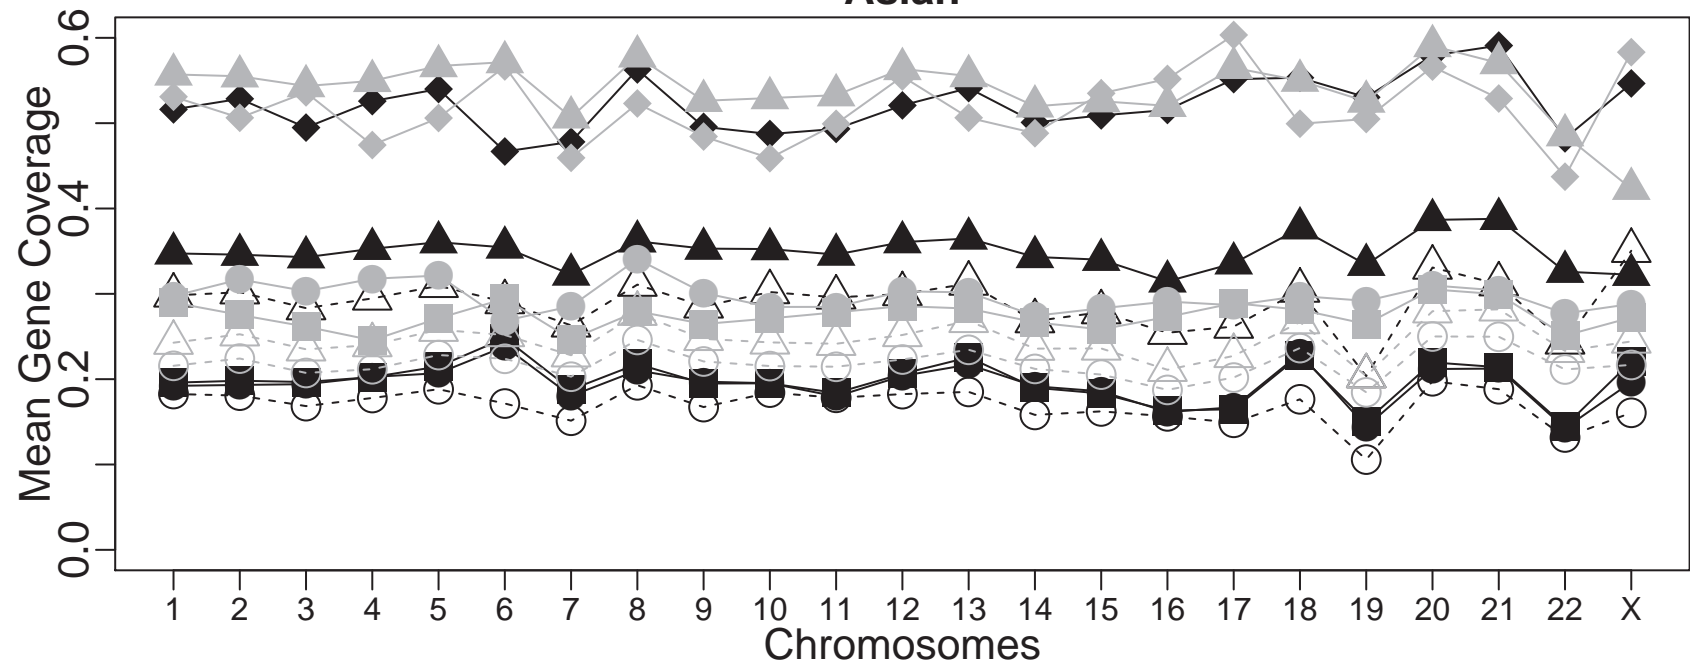

### African

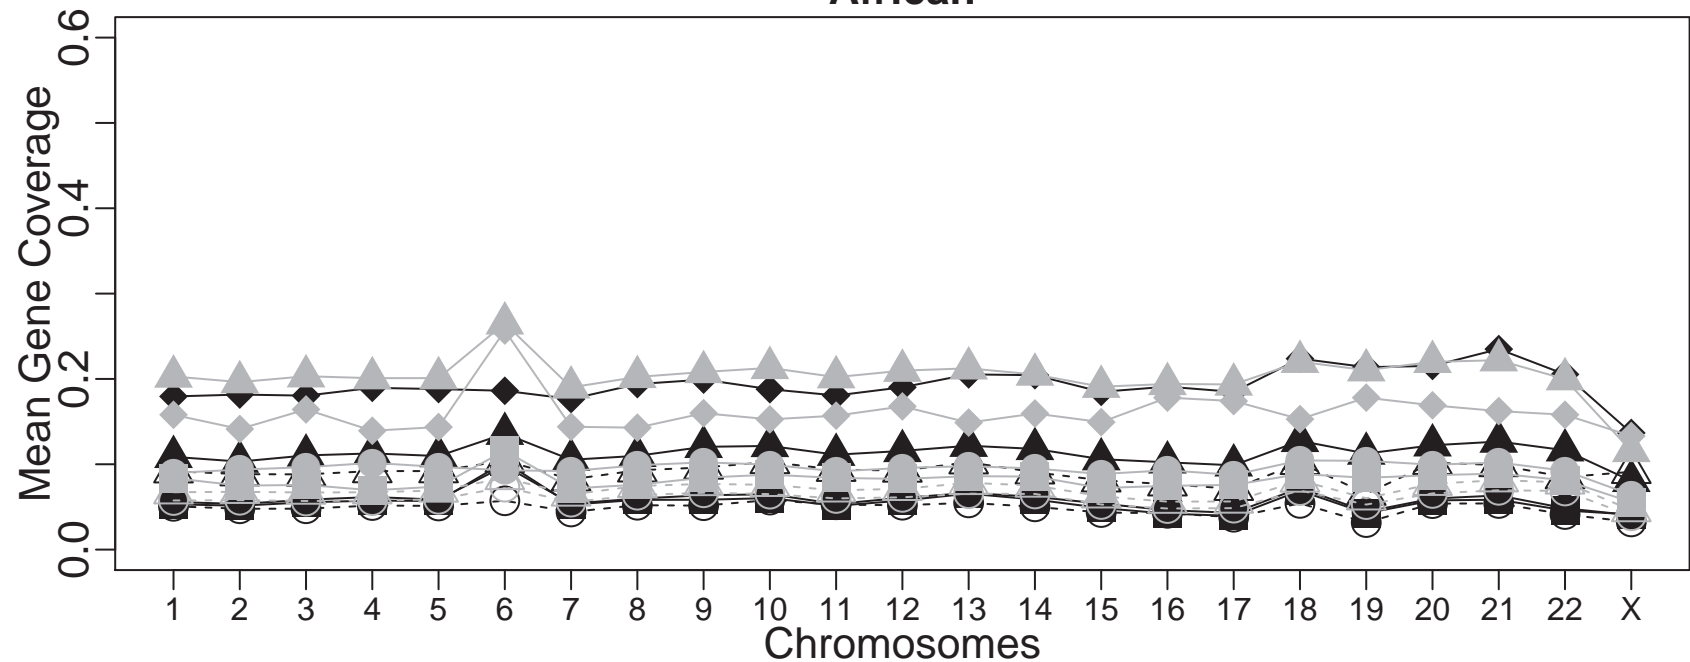

- |   |                        |   |                   |
|---|------------------------|---|-------------------|
| ■ | Axiom GW EU            | ■ | Human OmniExpress |
| ● | Axiom GW ASI           | ● | Human Omni1S-8    |
| ▲ | Axiom GW CHB           | ▲ | Human Omni2.5-8   |
| ◆ | Axiom GW PanAFR        | ◆ | Human Omni2.5S-8  |
| ○ | Axiom GW SNP Array 5.0 | ○ | Human Hap550      |
| △ | Axiom GW SNP Array 6.0 | △ | Human Hap650Y     |
