# Supplementary material
Source: PubMed Central journal article supplement (PMC4135415)
Supplement: ejhg2013304x3.pdf [file ejhg2013304x3.pdf]

### European

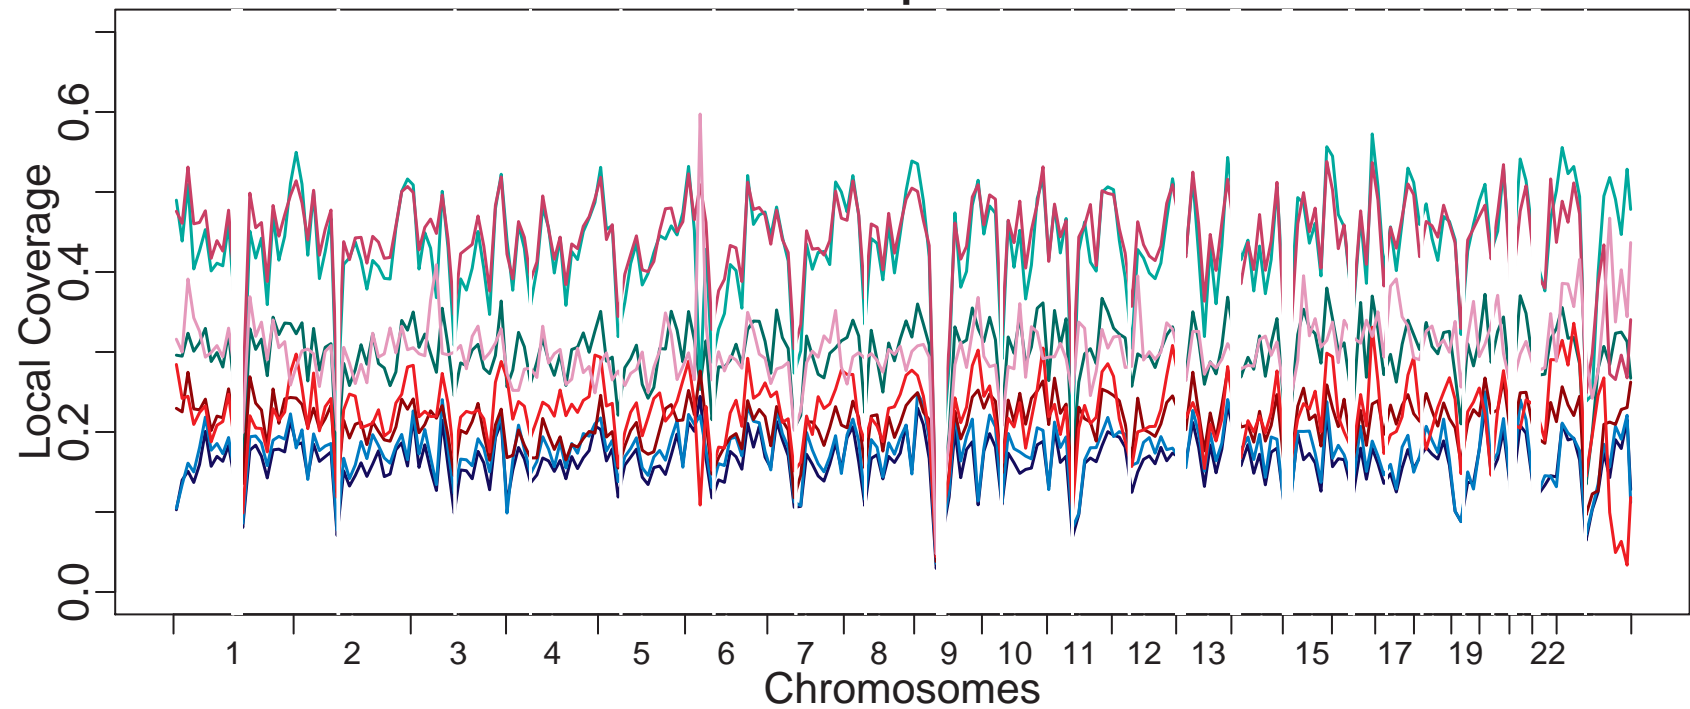

### Asian

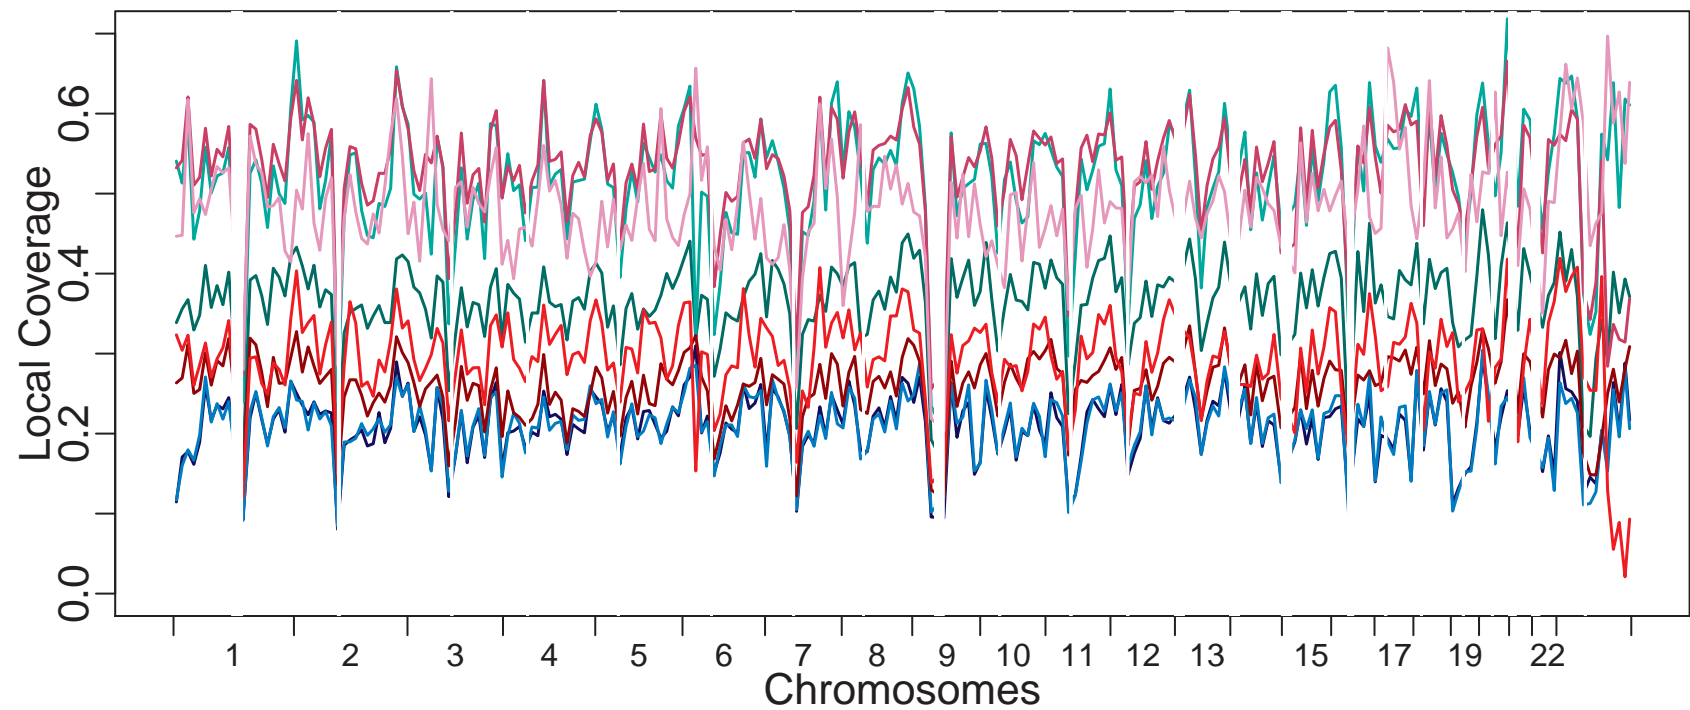

### African

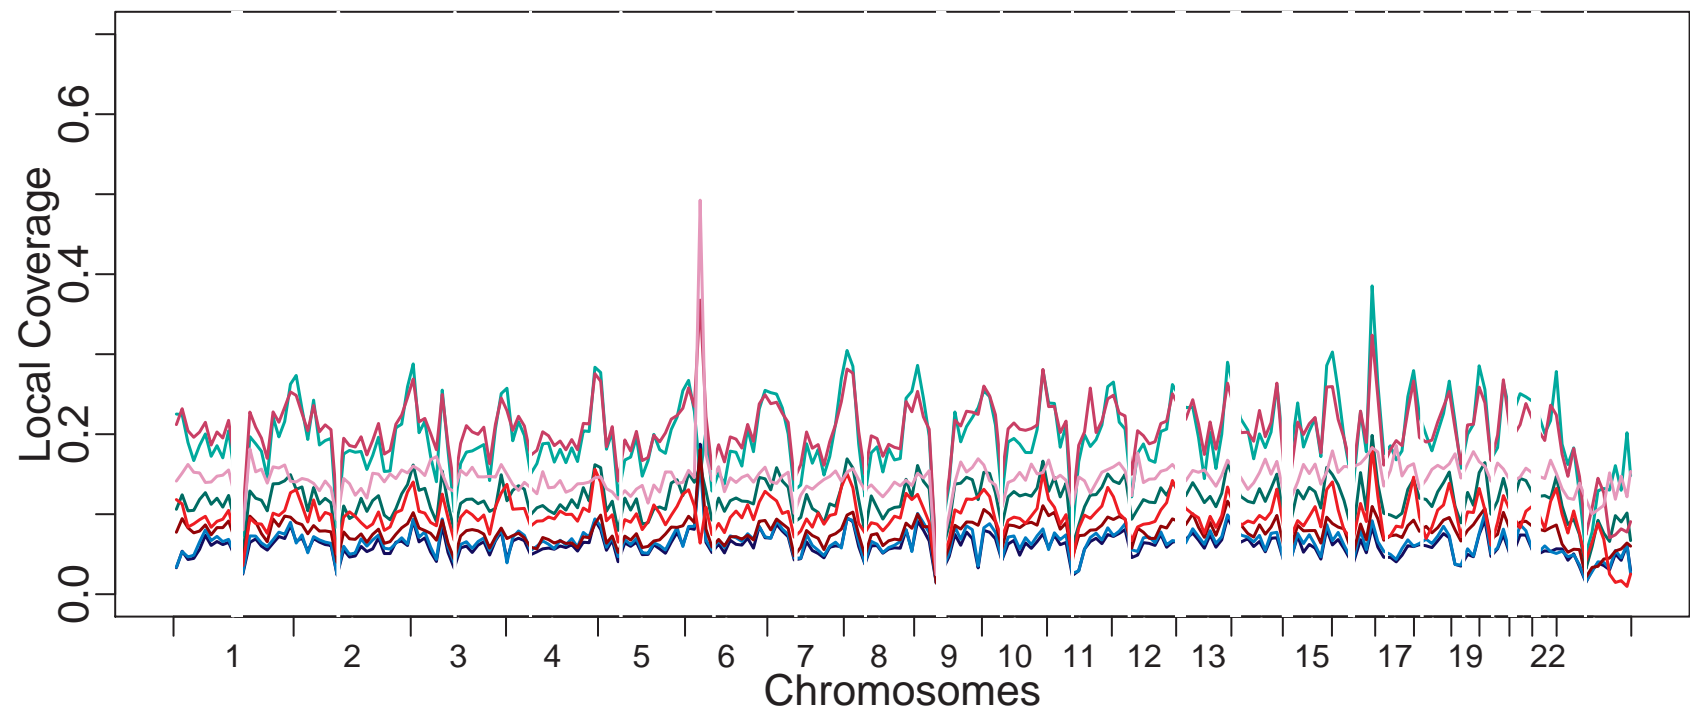

- Axiom GW EU
- Axiom GW ASI
- Axiom GW CHB
- Axiom GW PanAFR
- Human OmniExpress
- Human Omni1S-8
- Human Omni2.5-8
- Human Omni2.5S-8
