# Supplementary material
Source: PubMed Central journal article supplement (PMC4135415)

# Cost per Sample

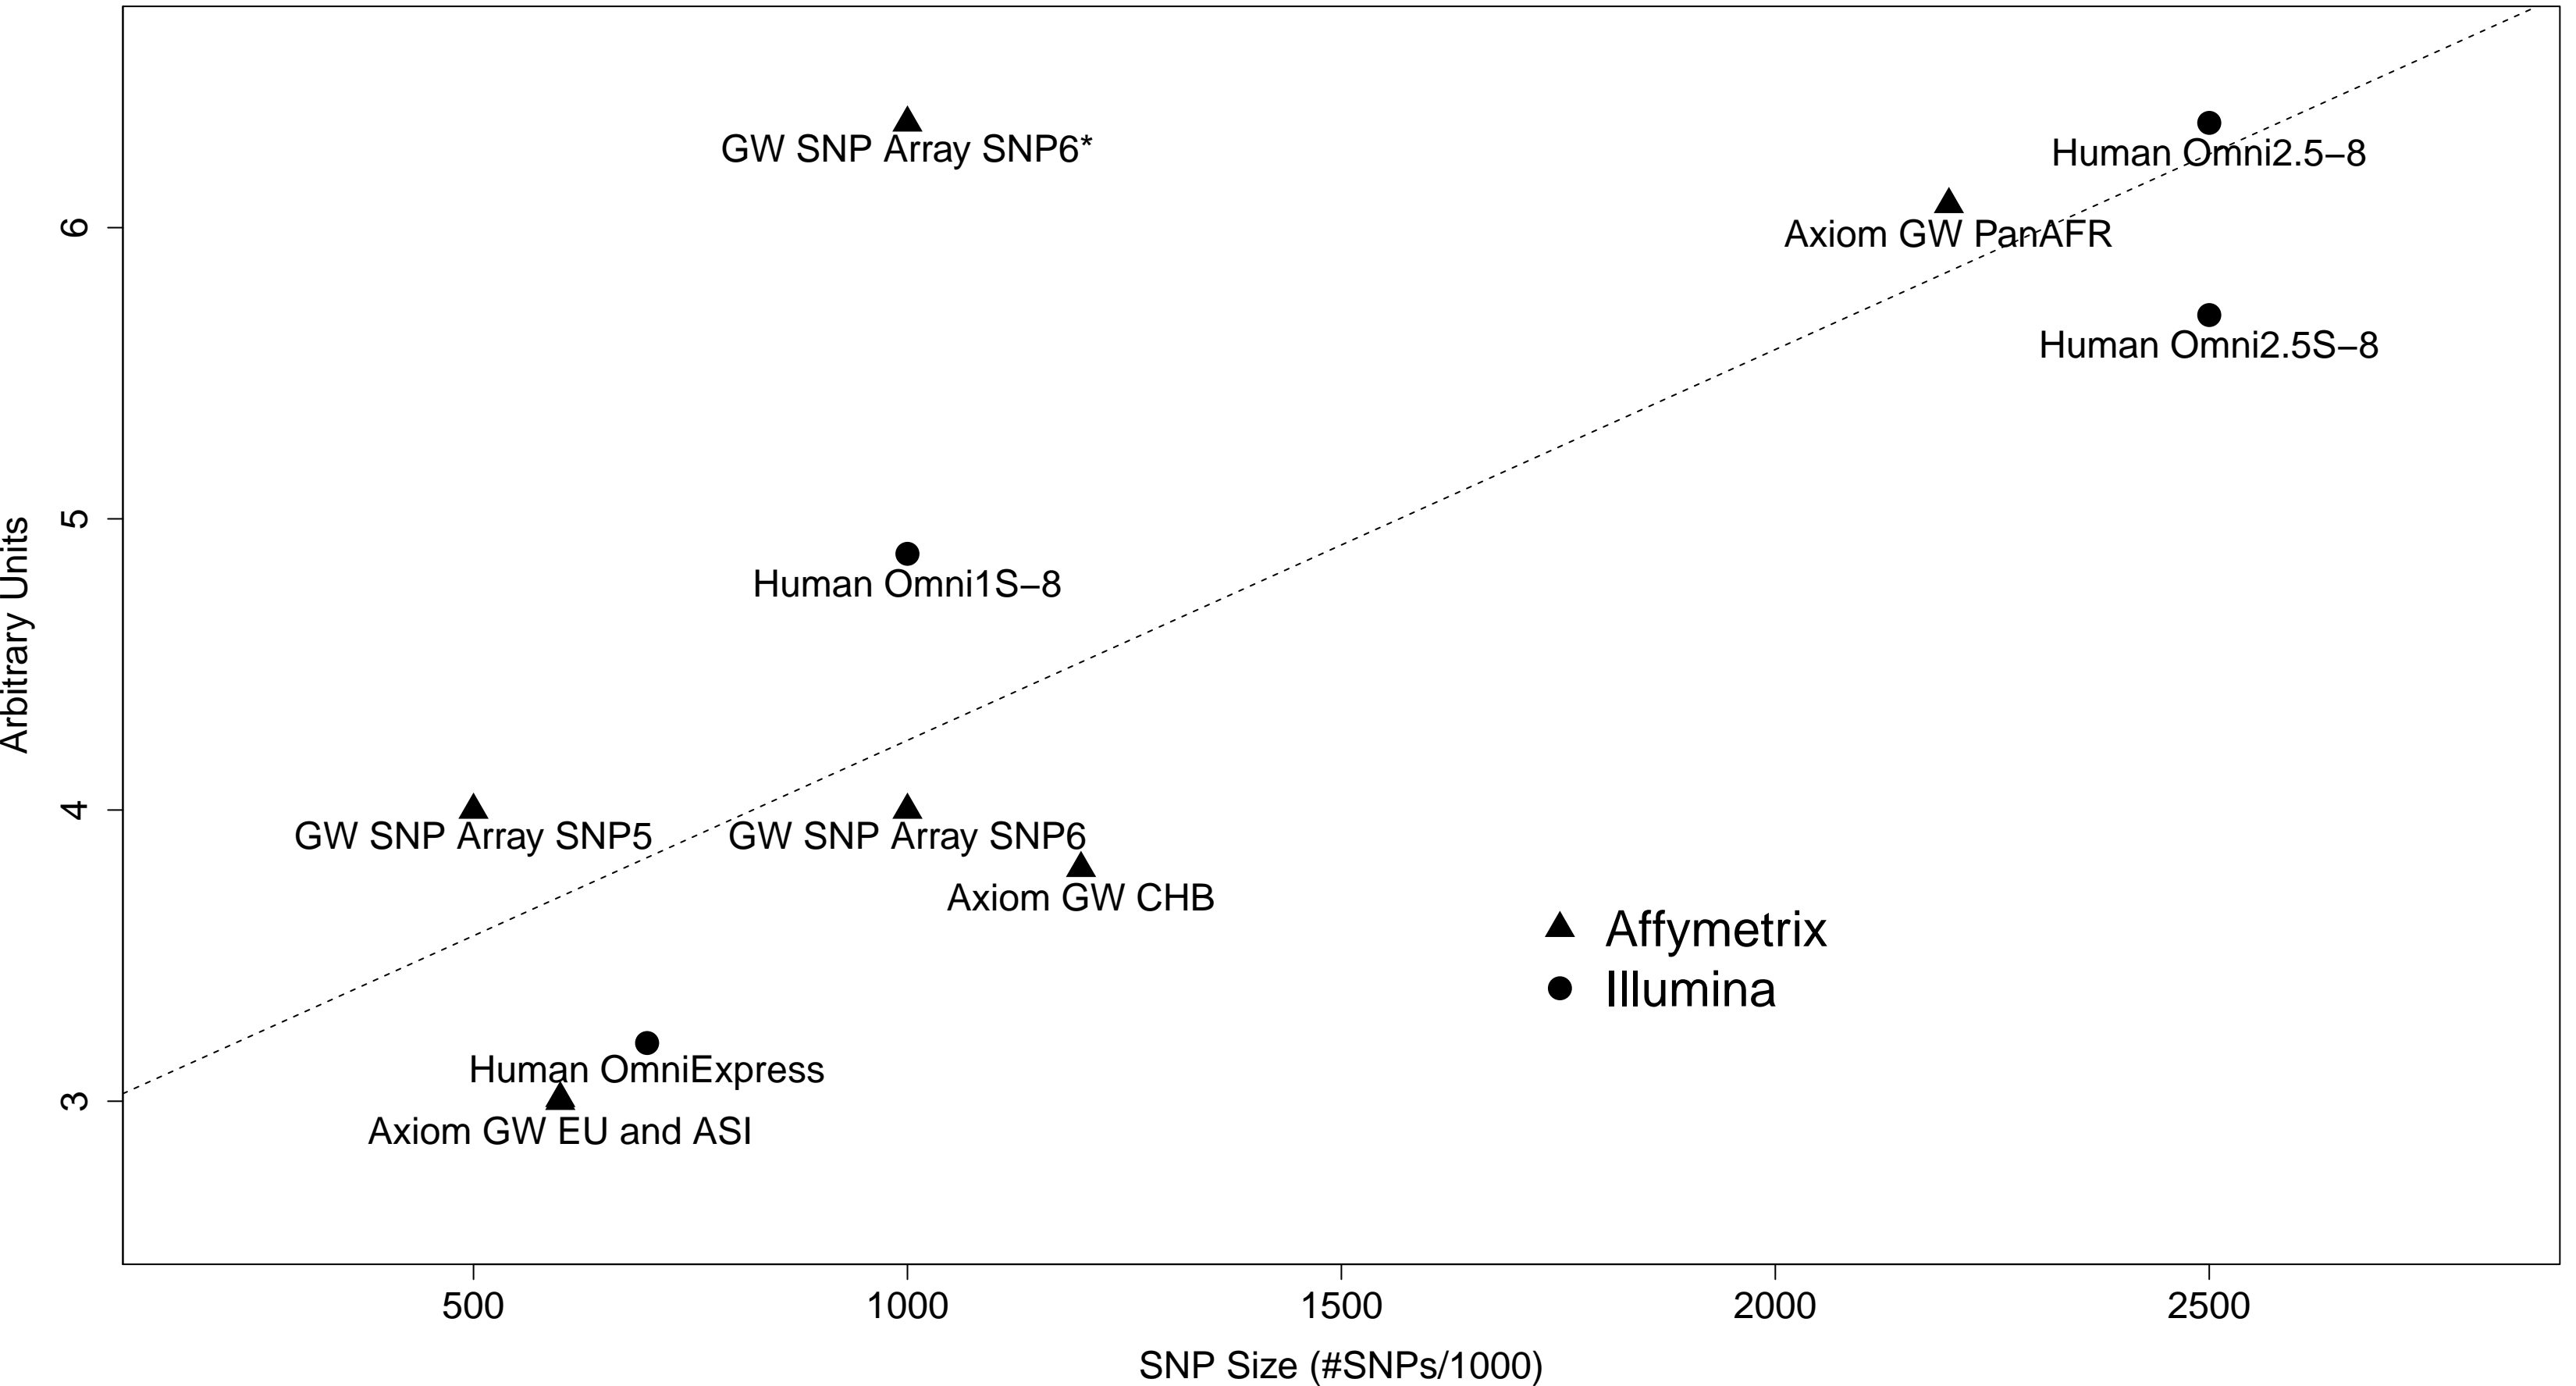

Supplement: ejhg2013304x1.pdf [file ejhg2013304x1.pdf]
